# Supplementary material for: Vitamin D suppresses bleomycin-induced pulmonary fibrosis by targeting the local renin–angiotensin system in the lung
Source: PubMed Central journal article supplement (PMC8367953; doi:10.1038/s41598-021-96152-7), 2021-08-16

Figure 2B

$\alpha$ -SMA

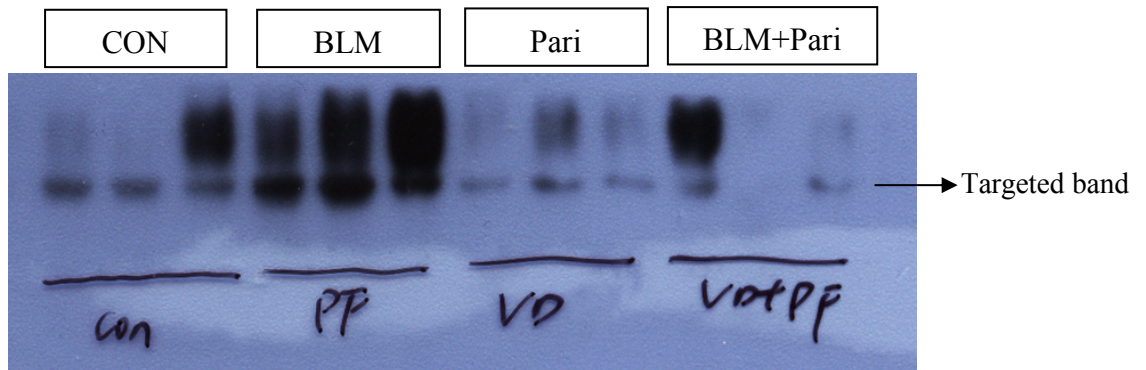

TGF- $\beta$ 1

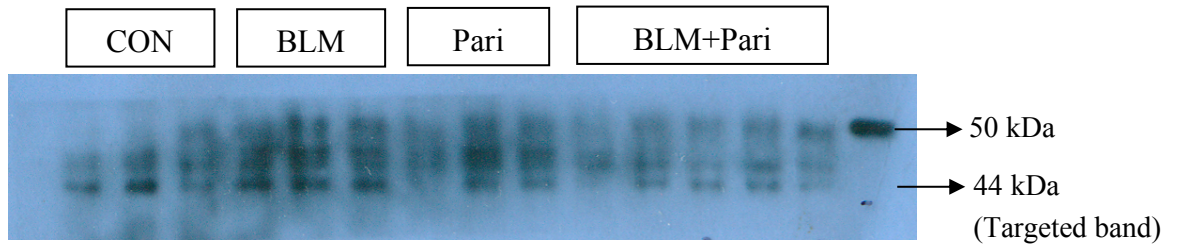

Col I

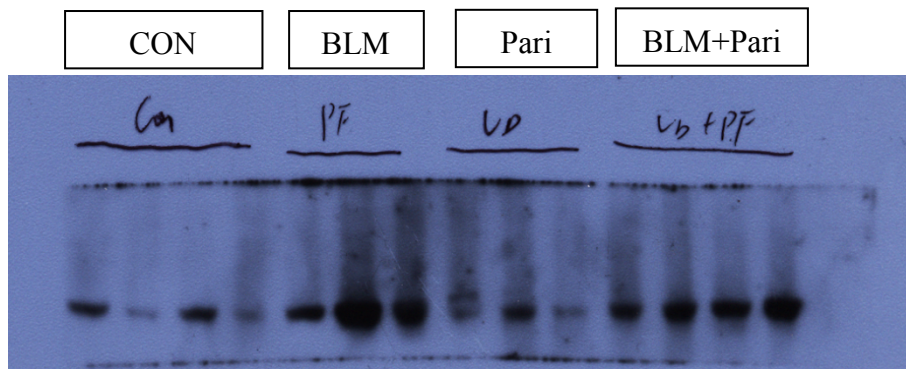

FN

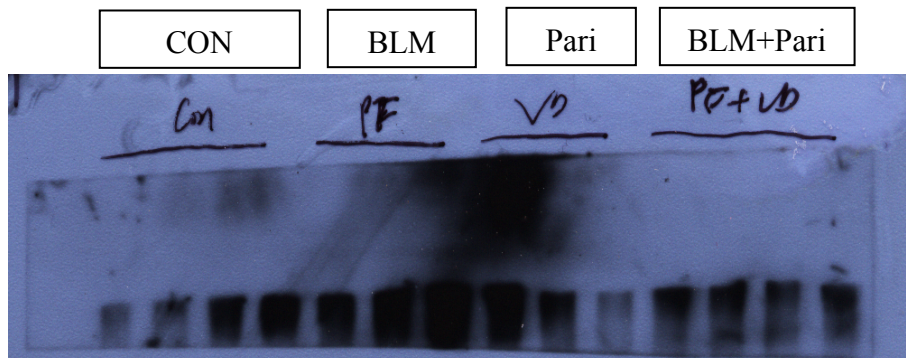

$\beta$ -actin

| CON | BLM | Pari | BLM+Pari |
|-----|-----|------|----------|
|-----|-----|------|----------|

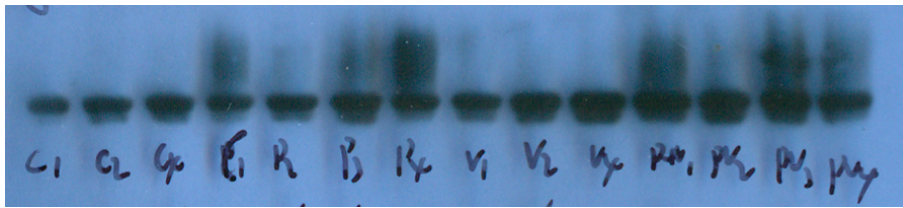

Figure 3B

VDR

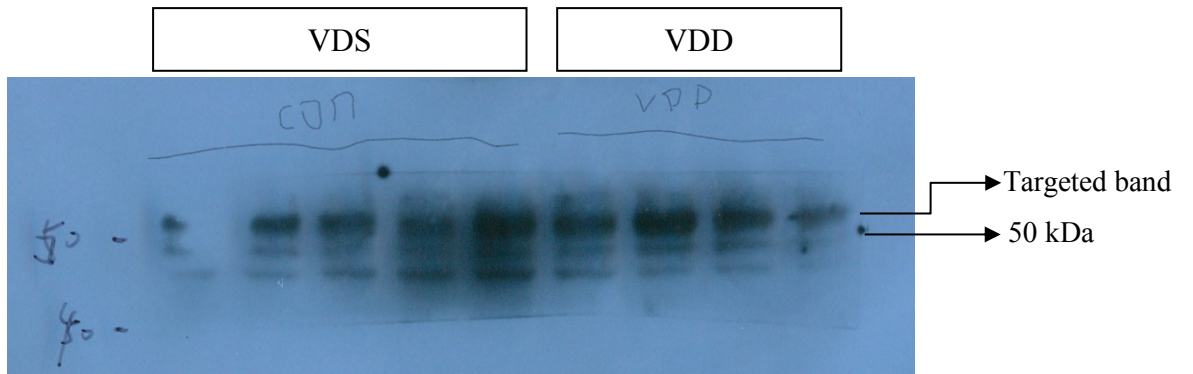

$\beta$ -actin

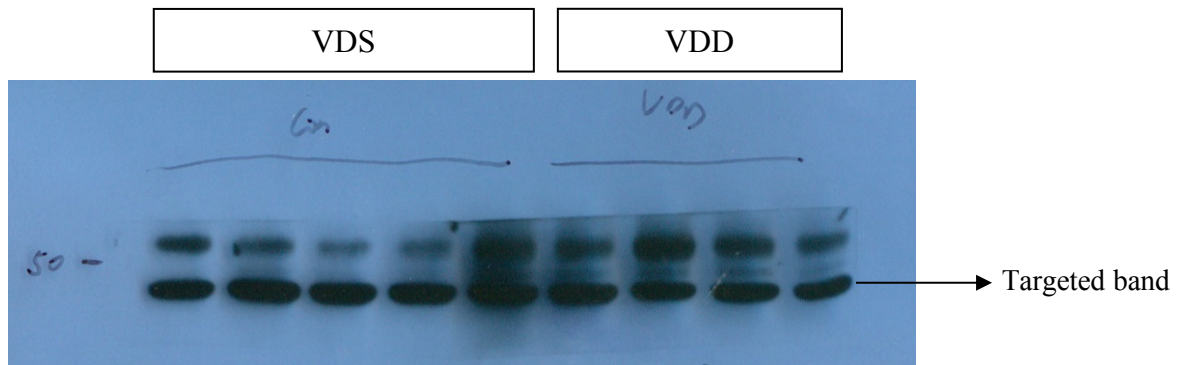

Figure 4B

$\alpha$ -SMA

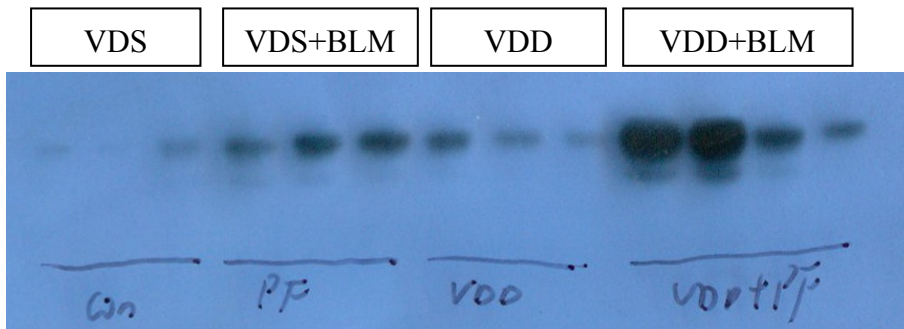

TGF- $\beta$ 1

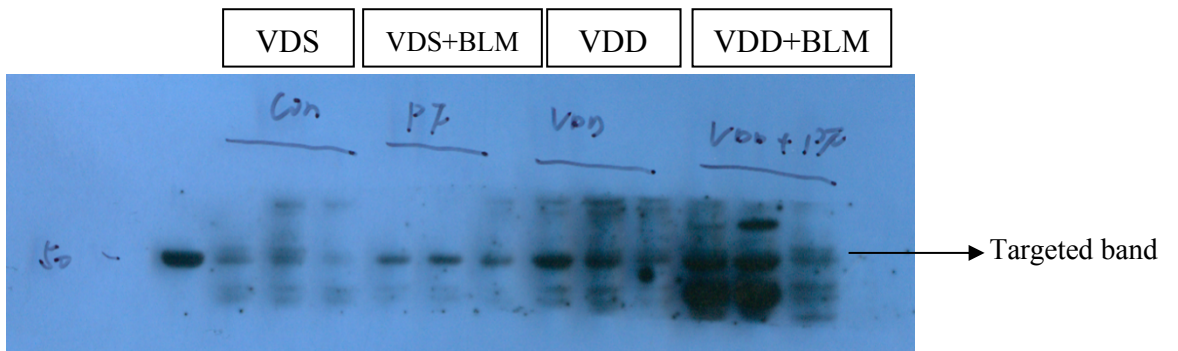

Col I

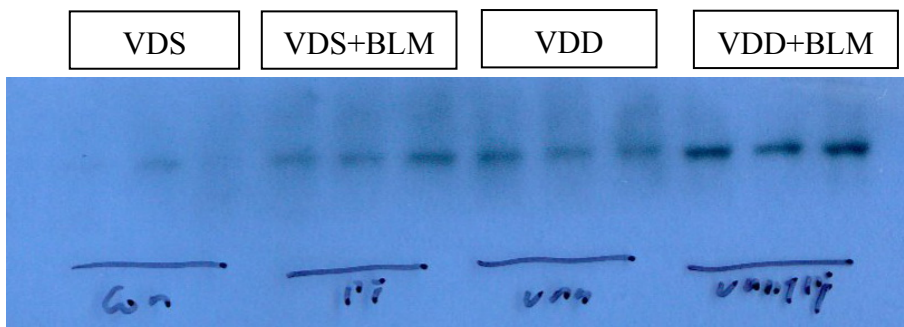

FN

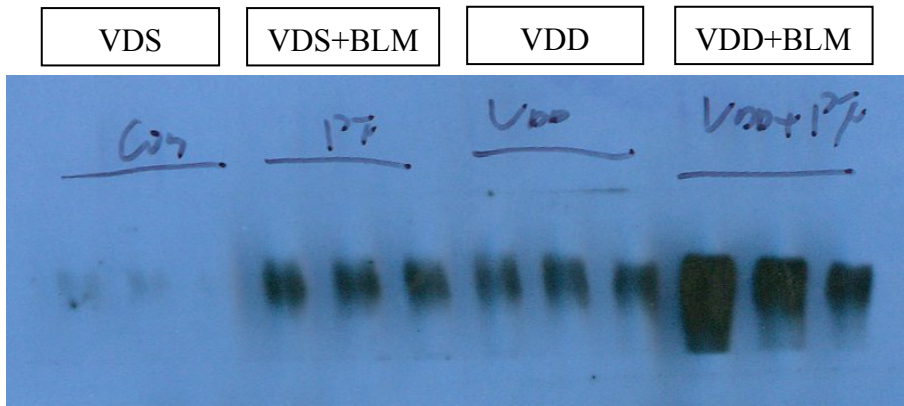

$\beta$ -actin

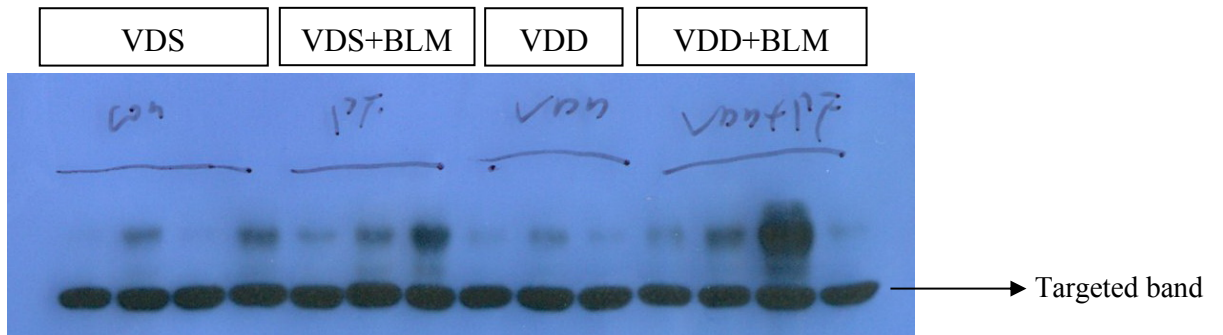

Figure 5B

Renin

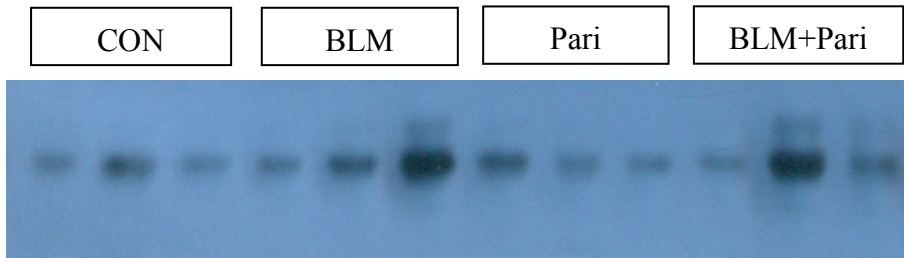

AT1R

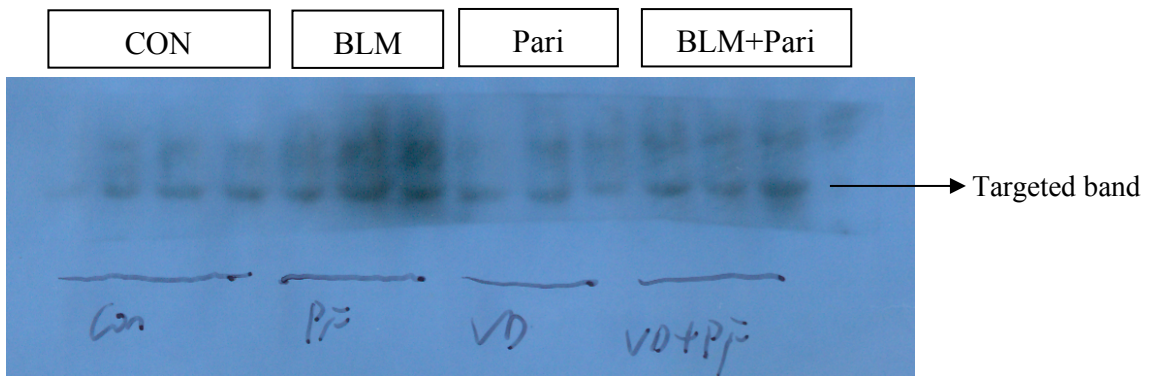

AGT

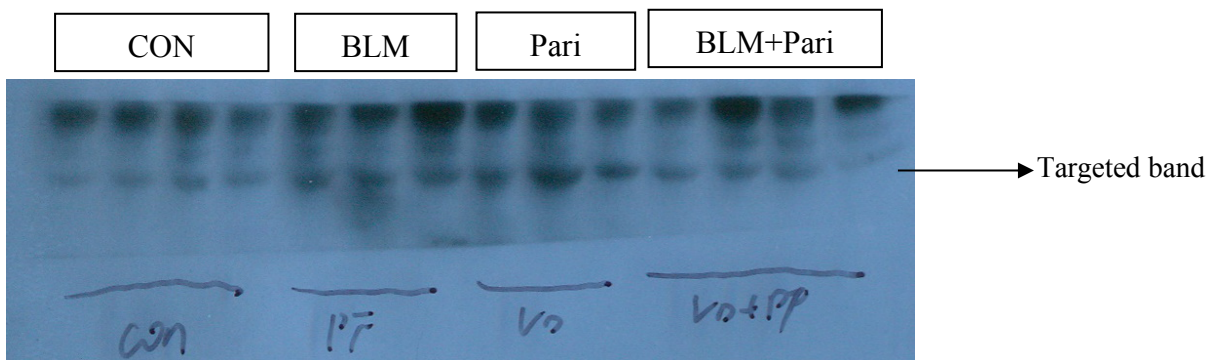

$\beta$ -actin

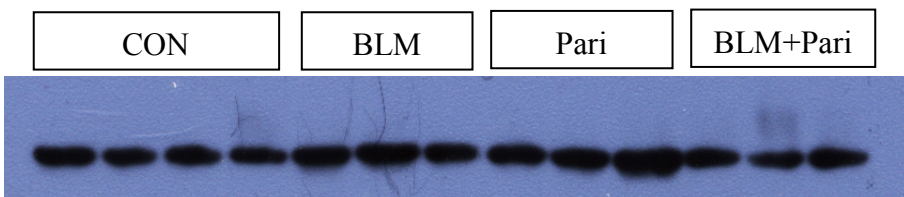

Figure 5E

Renin

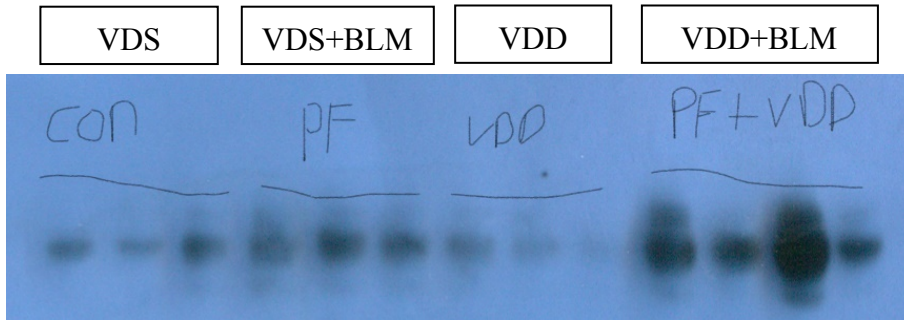

AT1R

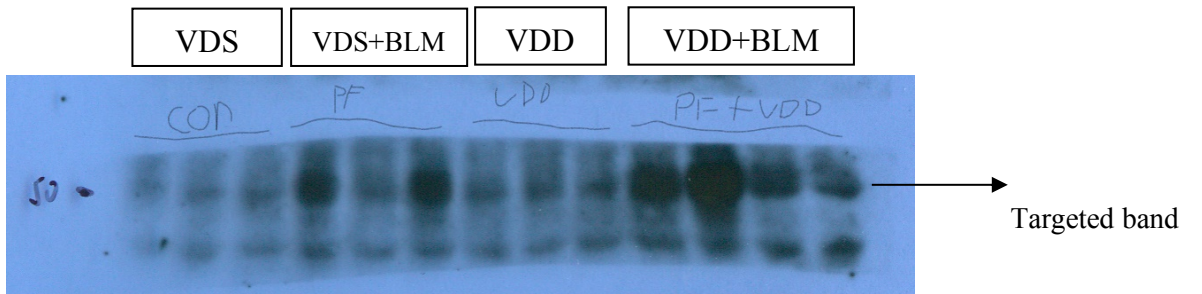

AGT

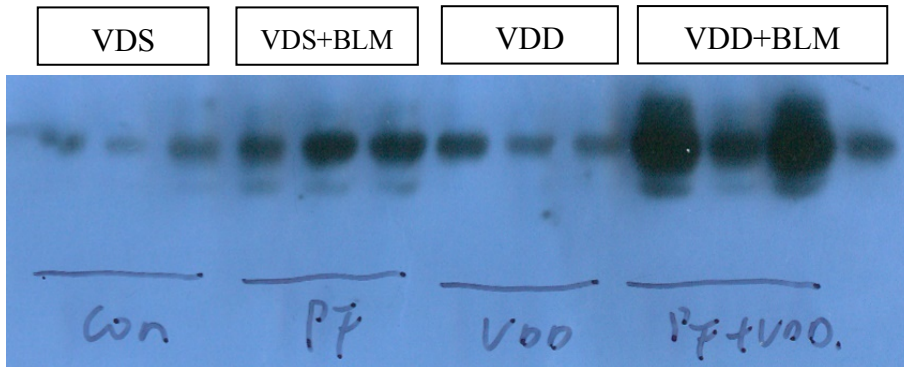

$\beta$ -actin

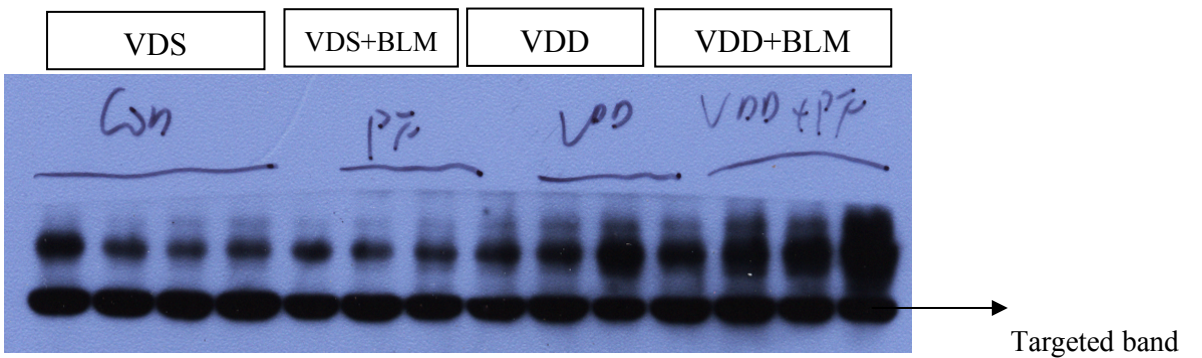

Figure 7A

$\alpha$ -SMA

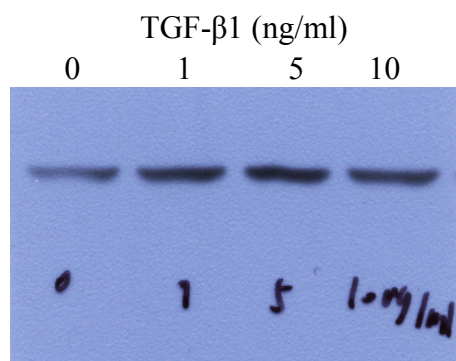

$\beta$ -actin

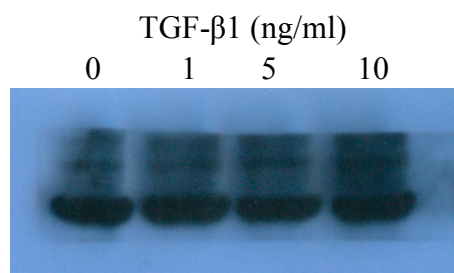



Figure 7C

$\alpha$ -SMA

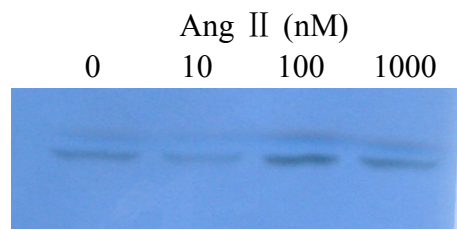

$\beta$ -actin

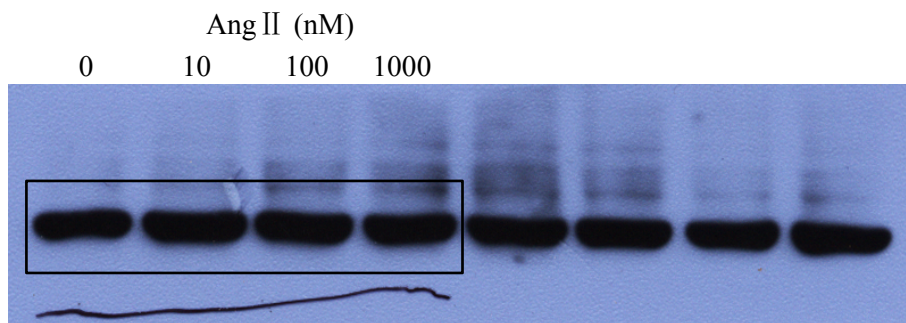

Figure 7E

AT1R

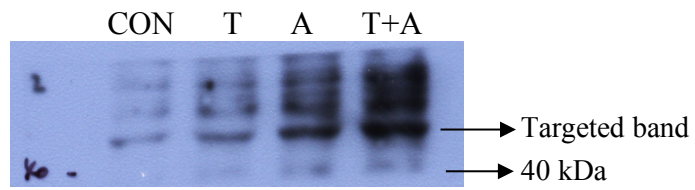

$\alpha$ -SMA

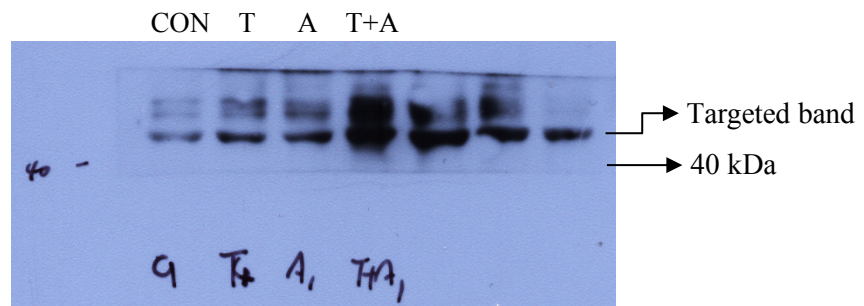

TGF- $\beta$ 1

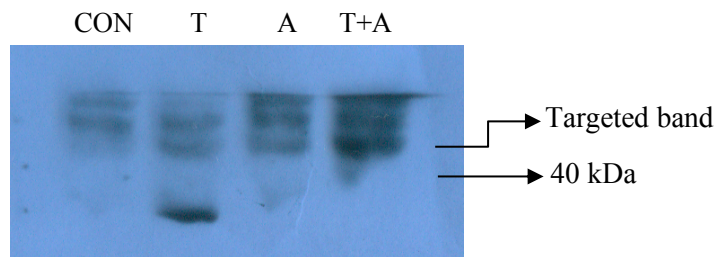

Col I

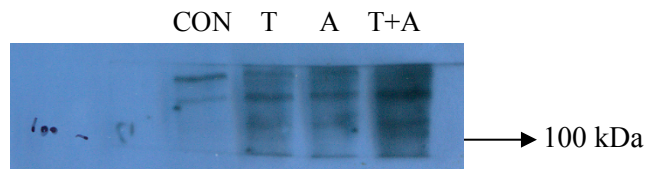

FN

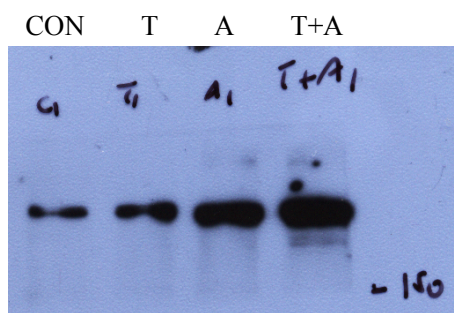

$\beta$ -actin

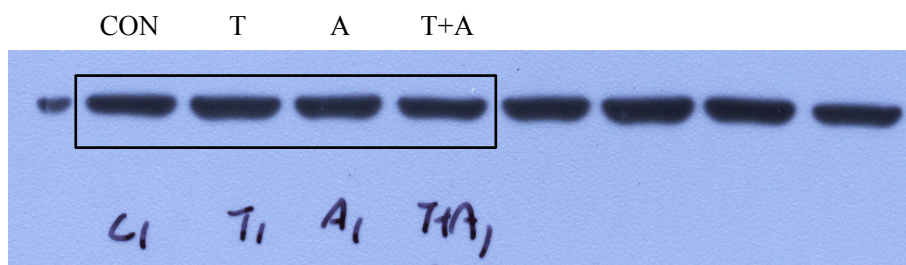

Figure 7G

$\alpha$ -SMA

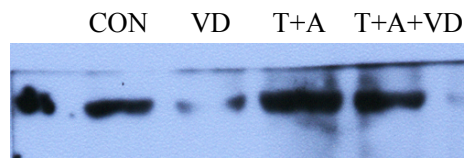

TGF- $\beta$ 1

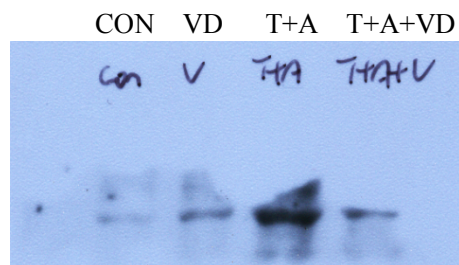

Col I

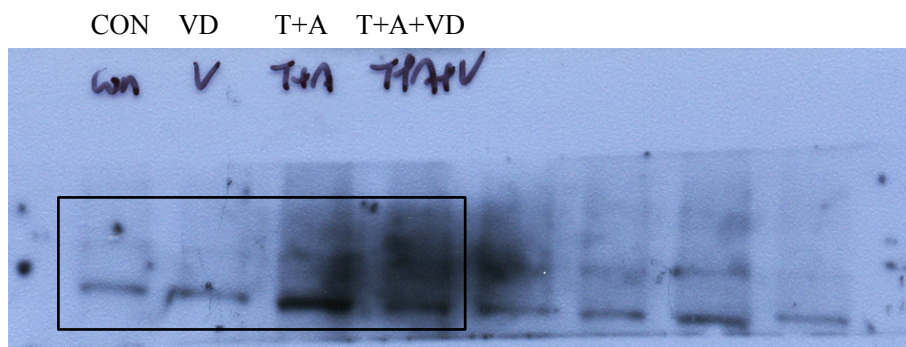

FN

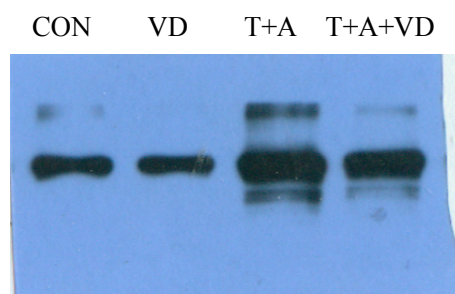

$\beta$ -actin

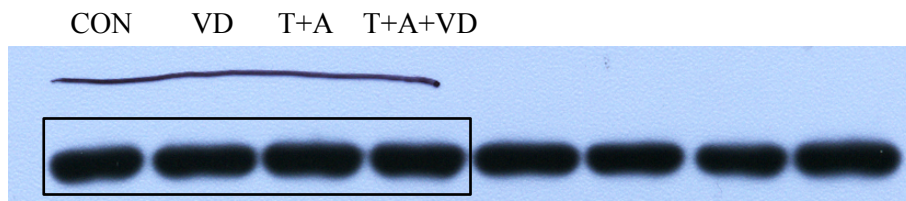

Supplement: 41598_2021_96152_MOESM1_ESM.pdf [file 41598_2021_96152_MOESM1_ESM.pdf]
